# Supplementary material for: Scientific Collaboration at National Institute of the Atlantic Forest (Brazil) on Scopus Database: Analysis of Institutional Domain
Source: Front Res Metr Anal. 2020 Dec 17;5:601442. doi: 10.3389/frma.2020.601442 (PMC8025981; doi:10.3389/frma.2020.601442)
Supplement: Supplementary file 2 [file datasheet2.xlsx]

## Sheet: INMA Production - Indicators
	Supplementary Material 02
Title	Authors	First or last INMA author	Authorship type	Employment relationship	Citations	FWC Impact	% Proeminence	Tópics	International collaboration	Collaborating countries	DOI or Link Scopus	Thematic Object of the Study
Distribution, morphological notes and conservation status of the psammophilus Microcambeva catfishes (Siluriformes: Trichomycteridae)	Sarmento-Soares L.M., Pessali T.C., Reis V.J.C., Medeiros L.S.D.E., Lima S.M.Q., Silva J.P., Martins-Pinheiro R.F., De Pinna M.C.C.	0	Multiple	Scholarshiper (1) and Voluntary (1)	0	0	88961	Loricariidae | Characidae | Trichomycteridae	0		10.11646/zootaxa.4712.4.6	Zoology
Eco-epidemiological profile and molecular characterization of simian foamy virus in a recently-captured invasive population of leontopithecus chrysomelas (golden-headed lion tamarin) in Rio de Janeiro, Brazil	Miranda T.S., Muniz C.P., Moreira S.B., Bueno M.G., Kierulff M.C.M., Molina C.V., Catão-Dias J.L., Pissinatti A., Soares M.A., Santos A.F.	0	Multiple	Scholarshiper	0	0	76860	Spumavirus | Simian Foamy Virus | Retroviridae	0		10.3390/v11100931	Zoology
Diversity of parasitoid wasps in conventional and organic guarana (Paullinia cupana var. sorbilis) cultivation areas in the Brazilian Amazon [Diversidade de vespas parasitoides em áreas de cultivo de guaraná (Paullinia cupana var. sorbilis) convencional e orgânico na Amazônia brasileira]	Schoeninger K., Souza J.L.P., Krug C., Oliveira M.L.	0	Quadruple	Scholarshiper	0	0	99804	Bombus | Pollinators | Neonicotinoids	0		10.1590/1809-4392201804560	Zoology
Multi-sensor prediction of Eucalyptus stand volume: A support vector approach	Souza G.S.A.D., Soares V.P., Leite H.G., Gleriani J.M., do Amaral C.H., Ferraz A.S., Silveira M.V.D.F., Santos J.F.C.D., Velloso S.G.S., Domingues G.F., Silva S.	0	Multiple	Scholarshiper	3	1.33	88891	Tandem-X | PALSAR | Forest Biomass	0		10.1016/j.isprsjprs.2019.08.002	Botany
Habitat Use in a Population of the Northern Muriqui (Brachyteles hypoxanthus)	Lima M., Mendes S.L., Strier K.B.	0	Triple	Permanent worker	0	0	88210	Rhinopithecus | Cercopithecidae | Atelinae	1	USA	10.1007/s10764-019-00098-7	Zoology
Uncovering the natural history of the bromeligenous frog crossodactylodes izecksohni (Leptodactylidae, Paratelmatobiinae)	Ferreira R.B., Mônico A.T., Zocca C.Z., Santos M.T.T., Lírio F.C.F., Tonini J.F.R., Sabagh L.T., Cipriano R.S., Waichert C., Crump M.L., Beard K.H., Toledo L.F., Duca C.	0	Multiple	Scholarshiper	2	1.56	85398	Leptodactylidae | Hylidae | Anura	1	USA	10.2994/SAJH-D-17-00092.1	Zoology
Can environmental complexity predict functional trait composition of ground-dwelling ant assemblages? A test across the Amazon Basin	Guilherme D.R., Souza J.L.P., Franklin E., Pequeno P.A.C.L., Chagas A.C.D., Baccaro F.B.	0	Multiple	Scholarshiper	1	0.62	90187	Ants | Hymenoptera | Crematogaster	0		10.1016/j.actao.2019.05.004	Zoology
Morphological traits and vertical distribution of hyporheic chironomid larvae in Atlantic Forest streams	Mugnai R., Serpa-Filho A., Nessimian J.L., Kury A.B., Milesi S.V.	0	Quintuple	Scholarshiper	0	0	90026	Hyporheic Zone | Macroinvertebrates | Gammarus Pulex	0		10.1080/03946975.2019.1639034	Zoology
A New Herbivory Report from Southeastern Brazil: Aristolochia hypoglauca Kuhlm (Piperales: Aristolochiaceae) as a Host Plant for Battus polydamas (Linnaeus, 1758) (Lepidoptera: Papilionidae)	Freitas J., Braun D.V., Tonini L., Serpa-Filho A., Alves-Araújo A.	0	Quintuple	Scholarshiper (1) and Voluntary (1)	0	0	80580	Nymphalidae | Riodinidae | Lycaenidae	0		10.3157/021.128.0404	Zoology
Novelties in Brazilian Begoniaceae I: Two new species from Bahia	Kollmann L.J.C.	1	Individual	Scholarshiper	0	0	77371	Begonia | Petermannia | Sect	0		10.11646/phytotaxa.404.2.1	Botany
Territory size and population density of the serra antwren (Formicivora serrana littoralis) in the sandy coastal plains of the atlantic forest in Southeastern Brazil	Chaves F.G., Vecchi M.B., Kenup C.F., Alves M.A.S.	1	Quadruple	Scholarshiper	0	0	96580	Camera Trapping | Tigers | Capture-Recapture	0		10.5735/086.056.0106	Zoology
Systematics, biogeography and conservation of Paragenidens grandoculis n. Gen. and n. Comb. (Siluriformes; Ariidae), a critically endangered species from southeastern Brazil	Marceniuk A.P., Da Silva Ingenito L.F., Lima F.C.T., Gasparini J.L.R., Oliveira C.	0	Quintuple	Scholarshiper	0	0	27760	Ariidae | Catfishes | Aspistor	0		10.11646/zootaxa.4586.3.2	Zoology
A New Species of Anthurium (Araceae) with Cordate Leaves from Southeastern Brazil	Valadares R.T., Kollmann L.J.C., Sakuragui C.M.	0	Triple	Scholarshiper	1	0.24	74922	Anthurium | Araceae | Philodendron	0		10.3417/2018270	Botany
Status of the northern muriqui (Brachyteles hypoxanthus) in the time of yellow fever	Strier K.B., Tabacow F.P., de Possamai C.B., Ferreira A.I.G., Nery M.S., de Melo F.R., Mendes S.L.	1	Multiple	Permanent worker	4	3.68	97020	Yellow Fever Virus | Haemagogus | Flaviviridae	1	USA	10.1007/s10329-018-0701-8	Zoology
Occurrence of Hymenoptera on pig carcasses in a tropical rainforest in Central Amazonia, Brazil	Somavilla A., Souza J.L.P., Da Silva A.O., Keppler R.L.F.	0	Quadruple	Scholarshiper	0	0	95138	Forensic Entomology | Calliphoridae | Chrysomya Megacephala	0		10.13102/sociobiology.v66i2.4311	Zoology
Surface indicators are correlated with soil multifunctionality in global drylands	Eldridge D.J., Delgado-Baquerizo M., Quero J.L., Ochoa V., Gozalo B., García-Palacios P., Escolar C., García-Gómez M., Prina A., Bowker M.A., Bran D.E., Castro I., Cea A., Derak M., Espinosa C.I., Florentino A., Gaitán J.J., Gatica G., Gómez-González S., Ghiloufi W., Gutierrez J.R., Gusmán-Montalván E., Hernández R.M., Hughes F.M., Muiño W., Monerris J., Ospina A., Ramírez D.A., Ribas-Fernández Y…	0	Multiple	Scholarshiper	2	5.81	96889	Biological Soil Crusts | Lichen Crusts | Microcoleus	1	Argentina, Australia, Canada, Chile, Ecuador, Spain, USA, Morocco, Peru, Tunisia, Venezuela	10.1111/1365-2664.13540	Others
Review of the Camponotus kiesenwetteri group (Hymenoptera, formicidae) in the Aegean with the description of a new species	Salata S., Loss A.C., Karaman C., Kiran K., Borowiec L.	0	Quintuple	Scholarshiper	1	0.39	77656	Formica | Temnothorax | Ants	1	USA, Poland, Turkey	10.3897/zookeys.899.46933	Zoology
Molecular sexing and intersexual differences in the morphometry of the hangnest tody-tyrant hemitriccus nidipendulus (Passeriformes: Rhynchocyclidae)	Medeiros R.T., Chaves F.G., Vecchi M.B., Nogueira D.M., Alves M.A.S.	0	Quintuple	Scholarshiper	0	0	65090	Sex Determination | W Chromosome | DNA Helicase	0		10.3897/zoologia.36.e32771	Zoology
Malformation in three anuran species from a preserved remnant of atlantic forest in southeastern Brazil [Malformação em três espécies de anuros de um remanescente preservado de mata atlântica no sudeste do Brasil]	Mônico A.T., Silva-Soares T., Koch E.D.	1	Triple	Scholarshiper (2)	0	0	64195	Ribeiroia Ondatrae | Cercariae | Amphibians	0		10.3897/neotropical.14.e37919	Zoology
Amphibians of Santa Teresa, Brazil: The hotspot further evaluated	Ferreira R.B., Mônico A.T., Silva E.T.D., Lirio F.C.F., Zocca C., Mageski M.M., Tonini J.F.R., Beard K.H., Duca C., Silva-Soares T.	0	Multiple	Scholarshiper (4)	2	1.56	85398	Leptodactylidae | Hylidae | Anura	1	USA	10.3897/zookeys.857.30302	Zoology
Interaction between frugivorous vertebrates and two plant species of the genus Spondias	Sampaio R.A.P., Moreira D.O., De Assis A.M., Mendes S.L., Gatti A.	0	Quintuple	Permanent worker (2)	1	0.78	96339	Seed Dispersal | Frugivores | Negative Dependence	0		10.1163/15707563-18000003	Others
First record of Amblyomma rotundatum Koch, 1844 (Acari: Ixodidae) parasitizing wild Caiman latirostris (Reptilia: Crocodylidae) in the Atlantic rainforest biome, southeastern Brazil	Acosta I.C.L., Martins T.F., Nóbrega Y.C., Mantovani T.C., Silva-Soares T., Santos M.R.D., Tadokoro C.E., Labruna M.B.	0	Multiple	Scholarshiper	3	2.76	94890	Amblyomma | Ixodidae | Rickettsia	0		https://www.scopus.com/inward/record.uri?eid=2-s2.0-85060283695&partnerID=40&md5=be6751b5df47238500033a43f729cb99	Zoology
Begonia trevisoensis, a new species of begonia sect. pritzelia (begoniaceae) from Santa Catarina State, Brazil	Jaramillo J.C., Kollmann L.J.C., Fiaschi P.	0	Triple	Scholarshiper	0	0	77371	Begonia | Petermannia | Sect	0		10.11646/phytotaxa.381.1.8	Botany
Begonia langenbergiana (Begoniaceae) a new species from the south of São Paulo State, Brazil	Kollmann L.J.C.	1	Individual	Scholarshiper	0	0	79557	Floristics | Cerrado | Basal Area	0		10.11646/phytotaxa.381.1.10	Botany
Wrongly identified material of davilla macrocarpa (Dilleniaceae) represents two new species from Brazil	de Fraga C.N., Stehmann J.R.	1	Double	Permanent worker	0	0	29626	Dillenia Indica | Calyx | Betulic Acid	0		10.5091/plecevo.2018.1380	Botany
Taxonomy of begonia wollnyi herzog and begonia arrogans irmsch.	Tebbitt M.C., Andrada A.R., Kollmann L.J.C., Moonlight P.W.	0	Quadruple	Scholarshiper	0	0	77371	Begonia | Petermannia | Sect	1	Argentina, USA, United Kingdom	10.1017/S0960428618000069	Botany
Four new rupicolous species of pleroma (Melastomataceae) endemic to Espírito Santo, Brazil	Meyer F.S., Kollmann L.J.C., De Fraga C.N., Goldenberg R.	0	Quadruple	Scholarshiper (2) and Permanent worker (1)	1	0.25	78707	Melastomataceae | Hypanthium | Clidemia	0		10.11646/phytotaxa.348.4.1	Botany
Filling gaps in the geographic distribution of Anolis fuscoauratus d’Orbigny, 1837 (Squamata, Dactyloidae) in the southeastern Brazilian Atlantic Forest	Silva-Soares T., Scherrer P.V., de Castro T.M., Salles R.O.L.	1	Quadruple	Scholarshiper	0	0	78020	Squamata | Teiidae | Lizards	0		10.15560/14.1.15	Zoology
Changes in fish assemblages caused by different neotropical biomes	Rodrigues L., Carmassi A., Perbiche-Neves G., Sarmento-Soares L.M.	1	Quadruple	Scholarshiper	0	0	89954	Characiformes | Ichthyofauna | Gillnets	0		10.3856/vol46-issue4-fulltext-3	Zoology
Anuran species in a remnant of the Atlantic rainforest in an urban area	Mageski M.M., Silva-Soares T., Duca C., Santos D.C.B.M.O., De Jesus Filho P.R., da Costa L.C., Clemente-Carvalho R.B.G.	0	Multiple	Scholarshiper	0	0	85398	Leptodactylidae | Hylidae | Anura	1	Canada	10.11606/1807-0205/2018.58.16	Zoology
Demographic monitoring of wild muriqui populations: Criteria for defining priority areas and monitoring intensity	Strier K.B., Possamai C.B., Tabacow F.P., Pissinatti A., Lanna A.M., de Melo F.R., Moreira L., Talebi M., Breves P., Mendes S.L., Jerusalinsky L.	0	Multiple	Permanent worker	5	0.54	78245	Alouatta | Atelidae | Primates	1	USA	10.1371/journal.pone.0188922	Zoology
Davilla hirsuticarpa (Dilleniaceae), a new species from the atlantic forest of Brazil	Fraga C.N., Aymard G., Stehmann J.R.	1	Triple	Permanent worker	1	0.15	29626	Dillenia Indica | Calyx | Betulic Acid	1	Venezuela	10.5091/plecevo.2017.1326	Botany
Variation in reproductive systems facilitates species boundaries of sympatric Vriesea (Bromeliaceae)	Neri J., Wendt T., Leles B., Dos Santos M.F., Palma-Silva C.	0	Quintuple	Permanent worker	8	1.24	80151	Primula | Floral Trait | Herkogamy	0		10.1093/botlinnean/box026	Botany
Hind limb malformation in the tree frog Corythomantis greeningi (Anura: Hylidae)	Silva-Soares T., Mônico A.T.	1	Double	Scholarshiper (2)	6	1.52	64195	Ribeiroia Ondatrae | Cercariae | Amphibians	0		10.11606/issn.2316-9079.v16i1p117-120	Zoology
Avoiding pitfalls in interdisciplinary education	Holt R.E., Woods P.J., Ferreira A.S.A., Bardarson H., Bonanomi S., Boonstra W.J., Butler W.E., Diekert F.K., Fouzai N., Holma M., Kokkalis A., Kvile K.Ø., Macdonald J.I., Malanski E., Nieminen E., Ottosen K.M., Pedersen M.W., Richter A., Rogers L., Romagnoni G., Snickars M., Törnroos A., Weigel B., Whittington J.D., Yletyinen J.	0	Multiple	Scholarshiper	1	0.09	61891	Interdisciplinary | Disciplinary Boundaries | Student Teams	1	Germany, Denmark, USA, Finland, Faroe Islands, Iceland, Italy, Norway, Netherlands, Sweden	10.3354/cr01491	Others
Comparative analysis of the integument of different tree frog species from Ololygon and Scinax genera (Anura: Hylidae)	da Silva H.A.M., Silva-Soares T., de Brito-Gitirana L.	0	Triple	Scholarshiper	1	0.25	61874	Skin Glands | Hylidae | Anura	0		10.3897/zoologia.34.e20176	Zoology
Anuran amphibians from swamps and lagoons of São Roque do Canaã, Espírito Santo, Southeastern Brazil [Anfíbios anuros de brejos e lagoas de São Roque do Canaã, Espírito Santo, Sudeste do Brasil]	Mônico A.T., Clemente-Carvalho R.B.G., Lopes S.R., Peloso P.L.V.	1	Quadruple	Scholarshiper	1	0.25	85398	Leptodactylidae | Hylidae | Anura	0		10.11606/0031-1049.2017.57.16	Zoology
Flora of the cangas of the Serra dos Carajás, Pará, Brazil: Begoniaceae [Flora das cangas da Serra dos Carajás, Pará, Brasil: Begoniaceae]	Kollmann L.J.C.	1	Individual	Scholarshiper	3	0.36	77371	Begonia | Petermannia | Sect	0		10.1590/2175-7860201667522	Botany
Diet and breeding of the poorly known White-chinned Swift Cypseloides cryptus Zimmer, 1945, in Brazil	Brito G.R.R., Figueira D.M., Buainain N., Firme D.H., Biancalana R.N., Assis C.P., Araujo G.G., Crozariol M.A., Frickes G.R., Parrini R., Ruschi P.A., Raposo M.A.	0	Multiple	Voluntary	1	0.23	76241	Edible Bird's Nests | Aerodramus | Apodidae	0		https://www.scopus.com/inward/record.uri?eid=2-s2.0-84979036798&partnerID=40&md5=c3a440bd2ce9876da18ec2cacaa108d8	Zoology
Three new species of Pleroma (Melastomataceae) from Inselbergs of Espírito Santo, Brazil	Meyer F.S., Goldenberg R., Kollmann L.J.C.	1	Triple	Scholarshiper (2)	10	1.18	78707	Melastomataceae | Hypanthium | Clidemia	0		10.11646/phytotaxa.282.3.3	Botany
The rediscovery of Philcoxia goiasensis (Plantaginaceae): lectotypification and notes on morphology, distribution and conservation of a threatened carnivorous species from the Serra Geral de Goiás, Brazil	Scatigna A.V., Amaral A.G., Munhoz C.B.R., Souza V.C., Simões A.O.	0	Quintuple	Scholarshiper	4	0.53	43924	Linderniaceae | Scrophulariaceae | Plantaginaceae	0		10.1007/s12225-016-9653-6	Botany
Escalated antipredator mechanisms of two neotropical marsupial treefrogs	Lourenço-De-Moraes R., Ferreira R.B., Mira-Mendes C.V., Zocca C.Z., Medeiros T., Ruas D.S., Rebouças R., Toledo L.F., Brodie E.D., Jr., Solé M.	0	Multiple	Scholarshiper (2)	12	1.42	25776	Tonic Immobility Response | Defensive Behavior | Anura	1	USA	https://www.scopus.com/inward/record.uri?eid=2-s2.0-85023753403&partnerID=40&md5=0e2e98d0989c11361826ef50603bc7a6	Zoology
Fish composition and species richness in eastern South American coastal lagoons: additional support for the freshwater ecoregions of the world	Petry A.C., Guimarães T.F., Vasconcellos F.M., Hartz S.M., Becker F.G., Rosa R.S., Goyenola G., Caramaschi E.P., Díaz de Astarloa J.M., Sarmento-Soares L.M., Vieira J.P., Garcia A.M., Teixeira de Mello F., de Melo F.A., Meerhoff M., Attayde J.L., Menezes R.F., Mazzeo N., Di Dario F.	0	Multiple	Scholarshiper	12	1.51	80598	Coastal Plains | Holocene | Sea-Level Change	1	Argentina, Uruguay	10.1111/jfb.13011	Zoology
Corallus hortulanus (Linnaeus, 1758) (Squamata: Serpentes: Boidae) diet: Predation events on two passeriformes at the Atlantic rainforest, Southeastern Brazil	Gonzalez R.C., Silva-Soares T., Crozariol M.A., Citeli N.K., Brito G.R.R.	0	Quintuple	Scholarshiper	2	0.46	79967	Eleutherodactylus | Cyclura | Iguanas	0		https://www.scopus.com/inward/record.uri?eid=2-s2.0-84961923082&partnerID=40&md5=5d882dbe55c425b46fc4edb46773e694	Zoology
Two new species of Pleroma (Melastomataceae) from Espírito Santo, Brazil	Goldenberg R., Kollmann L.J.C.	1	Double	Scholarshiper	14	1.71	78707	Melastomataceae | Hypanthium | Clidemia	0		10.1007/s12228-015-9390-4	Botany
First record of genus imparfinis from a northeastern coastal Brazilian river basin: I. borodini Mees & Cala, 1989 in Rio de Contas, Bahia	Sarmento-Soares L.M., Britski H.A., Anjos M., Zanata A.M., Martins-Pinheiro R.F., Barretto M.G.	1	Multiple	Scholarshiper	3	0.26	88961	Loricariidae | Characidae | Trichomycteridae	0		10.15560/12.1.1832	Zoology
The complete mitochondrial genome of the ruby-topaz hummingbird Chrysolampis mosquitus through Illumina sequencing	Souto H.M., Ruschi P.A., Furtado C., Jennings W.B., Prosdocimi F.	0	Quintuple	Voluntary	1	0.09	93415	Chloroplast Genome | Transfer RNA | Base Composition	0		10.3109/19401736.2014.915533	Zoology
Vascular epiphytes in seasonal semideciduous forest in the state of Espírito Santo and the similarity with other seasonal forests in Eastern Brazil [Epífitas vasculares em floresta estacional semidecidual no estado do Espírito Santo e similaridade com outras florestas estacionais no Leste do Brasil]	Couto D.R., Fontana A.P., Kollmann L.J.C., Manhães V.C., Francisco T.M., de Mello Cunha G.	0	Multiple	Scholarshiper	6	0.66	84957	Epiphytes | Bromeliaceae | Tillandsia	0		10.4025/actascibiolsci.v38i2.31320	Botany
Natural history notes	Unger S.D., Lawson C., Groves J.D., Spear S.F., More C.E., Stevens R.T., Earl J.E., O'Brien M., Brown T., West A., Whiteman H.H., Almeida-Santos W., Sousa J.C., Costa-Campos C.E., Silva-Soares T., Mônico A.T., Ferreira R.B., De Castro T.M., Tinoco I.A., Peña J.A., García E.R., Díaz J.A., Portela A.A.B., Dos Santos T.G., Teles D.A., Teixeira A.A.M., De Araujo Filho J.A., Rodrigues J.K., Barros A.L…	0	Multiple	Scholarshiper	0	0	0		1	Argentina, Australia, Bangladesh, Colombia, Costa Rica, Denmark, Spain, USA, France, Japan, Malaysia, Mexico, Panama, Peru, United Kingdom, Sri Lanka, Sweden, Thailand	https://www.scopus.com/inward/record.uri?eid=2-s2.0-85022336356&partnerID=40&md5=3232d93b80eb9d8d3f659cc7f84495f5	Others
Complete mitochondrial genome of the versicoloured emerald hummingbird Amazilia versicolor, a polymorphic species	Prosdocimi F., Souto H.M., Ruschi P.A., Furtado C., Jennings W.B.	0	Quintuple	Voluntary	2	0.17	93415	Chloroplast Genome | Transfer RNA | Base Composition	0		10.3109/19401736.2015.1007352	Zoology
Haematological reference for red-browed parrot (Amazona rhodocorytha, Salvadori, 1890) captive in the Atlantic Forest in Eastern Brazil	Mello R.H., Martins R.F., Bonissi D.A., Júnior J.L.B., Melotti T., Bianchi H., Bianchi M.A.F.	0	Multiple	Voluntary	0	0	71532	Caretta Caretta | Heterophils | Chelonia Mydas	0		10.1590/1678-4162-8600	Zoology
First records of Cheirodontinae (Actinopterygii: Characiformes: Characidae) from drainages of Espírito Santo State, southeastern Brazil	Ingenito L.F.S., Gomes T., Duboc L.F., Sarmento-Soares L.M.	1	Quadruple	Scholarshiper (2)	0	0	75543	Eucinostomus | Sphoeroides Testudineus | Diapterus	0		10.15560/12.4.1926	Zoology
A new species of Sinningia Nees (Gesneriaceae) from Espírito Santo and Rio de Janeiro states, Brazil	Chautems A., Peixoto M., Rossini J.	1	Triple	Scholarshiper	2	0.27	75061	Gesneriaceae | Primulina | Streptocarpus	1	Switzerland	10.15553/c2015v702a8	Zoology
Necrophagy on Rhinella ornata (Anura: Bufonidae) by the crab Trichodactylus fluviatilis (Crustacea: Trichodactylidae) in Atlantic Rainforest mountains of state of Rio de Janeiro, southeastern Brazil	Segadilha J., Silva-Soares T.	1	Double	Scholarshiper	6	0.92	47433	Dolomedes | Spiders | Theraphosidae	0		https://www.scopus.com/inward/record.uri?eid=2-s2.0-84939136587&partnerID=40&md5=fe5b1bbf82887661c0a7862283a2a078	Zoology
A new species of Characidium Reinhardt (Ostariophysi: Characiformes: Crenuchidae) from coastal rivers in the extreme south of Bahia, Brazil	Zanata A.M., Sarmento-Soares L.M., Martins-Pinheiro R.F.	1	Triple	Voluntary	2	0.36	88961	Loricariidae | Characidae | Trichomycteridae	0		10.11646/zootaxa.4040.3.8	Zoology
A new species of Centromochlus (Siluriformes, Auchenipteridae, Centromochlinae) from the middle Rio Tocantins basin, Brazil	Birindelli J.L.O., Sarmento-Soares L.M., Lima F.C.T.	0	Triple	Scholarshiper	2	0.14	88961	Loricariidae | Characidae | Trichomycteridae	0		10.1111/jfb.12750	Zoology
Begonia Jaguarensis L. Kollmann, R. S. Lopes & Peixoto (Begoniaceae), a new species from North of Espírito Santo State, Brazil	Kollmann L.J.C., Da Silva Lopes R., Peixoto A.L.	1	Triple	Scholarshiper	1	0.13	74240	Bromeliaceae | Vriesea | Aechmea	0		10.15553/c2015v701a4	Botany
A new proposal for the optimization of morphological analyses of micro and macroinvertebrates in ecological freshwater studies	Mugnai R., Serpa-Filho A.	1	Double	Scholarshiper	1	0	64860	Chironomidae | Macroinvertebrates | Clitellata	0		https://www.scopus.com/inward/record.uri?eid=2-s2.0-84929734994&partnerID=40&md5=13d2e581b986553b09114677ccb2921d	Zoology
A new species of the catfish genus Centromochlus (Siluriformes: Auchenipteridae: Centromochlinae) from the upper rio Paraná basin, Brazil	Sarmento-Soares L.M., Birindelli J.L.O.	1	Double	Scholarshiper	4	0.3	88961	Loricariidae | Characidae | Trichomycteridae	0		10.1590/1982-0224-20140042	Zoology
The unusual occurrence of a population of Dendropsophus elegans (Anura: Hylidae) in an inselberg of southeastern Brazil	Mageski M., Ferreira R.B., Zocca C., Teixeira R.L., Rödder D.	0	Quintuple	Scholarshiper (3)	1	0.23	75538	Hylidae | Anura | Leptodactylidae	1	Germany, USA	https://www.scopus.com/inward/record.uri?eid=2-s2.0-84902979762&partnerID=40&md5=73738538a98cead489a013b92542bd89	Zoology
Aristolochia assisii, a new neotenic species of Aristolochiaceae from Espírito Santo and Bahia, Brazil	Freitas J., De Lírio E.J., González F.	1	Triple	Scholarshiper	5	0.56	64667	Aristolochiaceae | Perianth | Asarum	1	Colombia	10.11646/phytotaxa.163.5.2	Botany
Five new Myrtaceae from southeastern Brazil	Sobral M., Kollmann L.J.C., Rochelle A.L.C., Da Costa Souza M., Aguiar O.T., Antunes K.	0	Multiple	Scholarshiper	0	0	77448	Myrtaceae | Myrcia | Eugenia	0		https://www.scopus.com/inward/record.uri?eid=2-s2.0-84928987456&partnerID=40&md5=5b8b99695223aa11be5d5616b2c78603	Botany
Miscellaneous new species of Brazilian Bromeliaceae - III	Leme E.M.C., Till W., Kollmann L.J.C., De Moura R.L., Ribeiro O.B.C.	0	Quadruple	Scholarshiper	9	0.97	74240	Bromeliaceae | Vriesea | Aechmea	1	Austria	10.11646/phytotaxa.177.2.1	Botany
Redescription of Moenkhausia doceana (Steindachner, 1877) (Ostariophysi: Characiformes): A characid from the Northeastern Mata Atlântica ecoregion, Brazil	Carvalho F.R., Sarmento-Soares L.M., Martins-Pinheiro R.F.	1	Triple	Voluntary (1) and Scholarshiper (1)	4	0.46	88961	Loricariidae | Characidae | Trichomycteridae	0		10.1590/1982-0224-20140006	Zoology
Pabstiella pseudotrifida L. Kollmann & D. R. Couto (Orchidaceae), a new species from Espírito Santo, Brazil	Kollmann L.J.C., Couto D.R.	1	Double	Scholarshiper	1	0	77813	Orchidaceae | Pleurothallis | Campylocentrum	0		https://www.scopus.com/inward/record.uri?eid=2-s2.0-84904874387&partnerID=40&md5=a621da364f76bd6e028808e554114650	Botany
Notes on the distribution and new records for four species of Begonia from Brazilian Atlantic Forest [Notas sobre a distribuição e registro de ampliaçã o de áreas de ocorrência de quatro espécies de Begonia da floresta atlântica brasileira]	Kollmann L.J.C., Peixoto A.L.	1	Double	Scholarshiper	2	0.22	77371	Begonia | Petermannia | Sect	0		https://www.scopus.com/inward/record.uri?eid=2-s2.0-84902212407&partnerID=40&md5=94d6f60a87f77f9da8f650edfb9abc47	Botany
Centromochlus meridionalis, a new catfish species from the southern amazonian limits, Mato Grosso state, Brazil (Siluriformes: Auchenipteridae)	Sarmento-Soares L.M., Cabeceira F.G., Carvalho L.N., Zuanon J., Akama A.	1	Quintuple	Scholarshiper	7	0.92	88961	Loricariidae | Characidae | Trichomycteridae	0		10.1590/S1679-62252013000400007	Zoology
Structure of vascular epiphyte component in a fragment of the Atlantic Forest in the mountain region of Espírito Santo [Estrutura do componente epífito vascular em trecho de Floresta Atlântica na região serrana do Espírito Santo]	Freitas J., de Assis A.M.	1	Double	Scholarshiper (1) and Permanent worker (1)	4	0.41	84957	Epiphytes | Bromeliaceae | Tillandsia	0		10.1590/S0100-67622013000500004	Botany
A new cauliflorous species of Aristolochia (Aristolochiaceae) from Espírito Santo, Brazil	Freitas J., de Lírio E.J., González F.	1	Triple	Scholarshiper	10	0.55	64667	Aristolochiaceae | Perianth | Asarum	1	Colombia	10.11646/phytotaxa.124.1.7	Botany
Glanidium botocudo, a new species from the rio Doce and rio Mucuri, Minas Gerais, Brazil (Siluriformes: Auchenipteridae) with comments on taxonomic position of Glanidium bockmanni Sarmento-Soares & Buckup	Sarmento-Soares L.M., Martins-Pinheiro R.F.	1	Double	Scholarshiper (1) and Voluntary (1)	6	0.61	88961	Loricariidae | Characidae | Trichomycteridae	0		10.1590/S1679-62252013000200004	Zoology
Miscellaneous new species of Brazilian Bromeliaceae	Leme E.M.C., Kollmann L.J.C.	1	Double	Scholarshiper	8	0.55	74240	Bromeliaceae | Vriesea | Aechmea	0		10.11646/phytotaxa.108.1.1	Botany
Life history traits of the sand stargazer Dactyloscopus tridigitatus (Teleostei: Blennioidei) from south-eastern Brazilian coast	Teixeira R.L., De Barros E.H., Ferreira R.B., Melo R.M.C., Salvador-Jr L.F.	1	Quintuple	Voluntary (2) and Scholarshiper (1)	2	0.31	69187	Blenniidae | Lipophrys Pholis | Salaria Pavo	1	USA	10.1017/S0025315411001998	Zoology
Tibouchina tedescoi: A new species in Tibouchina sect. Pleroma (Melastomataceae) from Espírito Santo, Brazil	Meirelles J., Kollmann L.J.C., Goldenberg R.	0	Triple	Scholarshiper (2)	10	0.55	78707	Melastomataceae | Hypanthium | Clidemia	0		10.1007/s12225-012-9375-3	Botany
Spatial and seasonal distribution of amphibians in four ponds at mountainous region in southeastern of Brazil: Influence of forest corridor [Distribuição espacial e sazonal de anfíbios em quatro poças na região serrana do Espírito Santo, sudeste do Brasil: Influência de corredores florestais]	Ferreira R.B., Dantas R.B., Riva Tonini J.F.	1	Triple	Scholarshiper	10	0.25	85398	Leptodactylidae | Hylidae | Anura	1	USA	10.1590/S0073-47212012000200008	Zoology
Food partitioning between the sympatric lizards Tropidurus torquatus and Ameiva ameiva in the Atlantic rainforest, northeastern Brazil	Freitas A.M., Teixeira R.L., Ferreira R.B.	1	Triple	Scholarshiper (1) and Voluntary (1)	3	0.19	78020	Squamata | Teiidae | Lizards	1	USA	https://www.scopus.com/inward/record.uri?eid=2-s2.0-84862870625&partnerID=40&md5=a8a2be21f817d69bba31d637d0c78bdc	Zoology
Diet, fecundity, and use of bromeliads by Phyllodytes luteolus (Anura: Hylidae) in southeastern Brazil	Ferreira R.B., Schineider J.A.P., Teixeira R.L.	1	Triple	Scholarshiper (1) and Voluntary (2)	29	1.12	75538	Hylidae | Anura | Leptodactylidae	1	USA	10.1670/09-040	Zoology
Anuran hotspot at Brazilian Atlantic rainforest invaded by the non-native Lithobates catesbeianus Shaw, 1802 (Anura: Ranidae)	Ferreira R.B., de Lima C.S.	1	Double	Scholarshiper	5	0	67737	Bullfrog | Pelophylax Nigromaculatus | Procambarus Clarkii	0		https://www.scopus.com/inward/record.uri?eid=2-s2.0-84869019186&partnerID=40&md5=d000d9f3cf14621cfd8d1083ad37b14b	Zoology
Begonia fragae L. Kollmann & Peixoto and Begonia wasshauseniana L. Kollmann & Peixoto (Begoniaceae), two new species from the state of Espirito Santo, Brazil	Kollmann L.J.-C., Peixoto A.L.	1	Double	Scholarshiper	6	0.41	77371	Begonia | Petermannia | Sect	0		10.15553/c2012v671a8	Botany
Physalaemus maximus feio, Pombal Jr. and Caramaschi, 1999 (Anura: Leiuperidae): Distribution extension and advertisement call	Peres J., Simon J.E.	1	Double	Scholarshiper (1) and Voluntary (1)	3	0	85398	Leptodactylidae | Hylidae | Anura	0		10.15560/8.3.507	Zoology
New records and distribution of Aplastodiscus arildae (Cruz & Peixoto, 1985) (Amphibia, Anura, Hylidae) in the southeast of Brazil	Silva-Soares T., Valadares A.P., Koski D.A., Ferreira R.B., da Cruz C.A.G.	0	Quintuple	Scholarshiper (2)	2	0.23	85398	Leptodactylidae | Hylidae | Anura	1	USA	https://www.scopus.com/inward/record.uri?eid=2-s2.0-80052004687&partnerID=40&md5=d4a6b069d84832a78c3c432a0fb826f9	Zoology
Trichomycterus payaya, new catfish (Siluriformes: Trichomycteridae) from headwaters of rio Itapicuru, Bahia, Brazil	Sarmento-Soares L.M., Zanata A.M., Martins-Pinheiro R.F.	1	Triple	Scholarshiper (1) and Voluntary (1)	7	0.48	88961	Loricariidae | Characidae | Trichomycteridae	0		10.1590/S1679-62252011000200003	Zoology
An evaluation of the species boundaries of two putative taxonomic entities of Euterpe (Arecaceae) based on reproductive and morphological features	Wendt T., da Cruz D.D., Demuner V.G., Guilherme F.A.G., Boudet-Fernandes H.	1	Quintuple	Permanent worker	4	0.13	77855	Arecaceae | Elaeidobius | Calamus	0		10.1016/j.flora.2010.03.002	Botany
The tadpole of the hylid frog scinax belloni (Anura: Hylidae)	Silva-Soares T., Costa P.N., Ferreira R.B., Weberc L.N.	0	Quadruple	Scholarshiper (2)	6	0.18	85398	Leptodactylidae | Hylidae | Anura	1	USA	https://www.scopus.com/inward/record.uri?eid=2-s2.0-78650743144&partnerID=40&md5=e0b7a4a7f85f7c20dd47d7ebadb3071f	Zoology
Living holed: Leptodactylus Latrans occupying crabs' burrows	Ferreira R.B., Riva Tonini J.F.	1	Double	Scholarshiper	8	0.24	46131	Melanophryniscus | Bufonidae | Rhinella	0		https://www.scopus.com/inward/record.uri?eid=2-s2.0-84876299098&partnerID=40&md5=802c70a1c2d701a4fbc1df85dc720b36	Zoology
Amphibians of Vitória, an urban area in south-eastern Brazil: First approximation	Ferreira R.B., Silva-Soares T., Rödder D.	1	Triple	Scholarshiper (2)	10	0.91	85398	Leptodactylidae | Hylidae | Anura	1	Alemanha, EUA	https://www.scopus.com/inward/record.uri?eid=2-s2.0-78649509556&partnerID=40&md5=46cf5a12a42d81c037b08529bb5e6768	Zoology
Record of opportunist predation of Marine Catfish Genidens genidens Valenciennes, 1839 (Siluriformes, Ariidae) by the Crested-Carcara Caracara plancus Miller, 1777 (Falconiformes, Falconidae) in estuary of Jucu River, Espirito Santo, Brazil [Registro da predação oportunista do Bagre-urutu (Genidens genidens Valenciennes, 1839, Siluriformes, Ariidae) pelo Carcará (Caracara plancus Miller, 1777, Fa…	Martinelli M.M.	1	Individual	Voluntary	1	0	51740	Glaucidium (Strigidae) | Hawks | Raptors	0		https://www.scopus.com/inward/record.uri?eid=2-s2.0-77956942895&partnerID=40&md5=ccd45f67ab8588c2178e0a60975a60f7	Zoology
Stream fishes and new conservation units in the southern Bahia [Peixes de riachos e novas unidades de conservação no sul da Bahia]	Cetra M., Sarmento-Soares L.M., Martins-Pinheiro R.F.	1	Triple	Scholarshiper (1) and Voluntary (1)	11	0.56	89954	Characiformes | Ichthyofauna | Gillnets	0		https://www.scopus.com/inward/record.uri?eid=2-s2.0-77956814730&partnerID=40&md5=223e8b30621eb2f87d6f78680afaf1ef	Zoology
The fish fauna on Rio Itanhém basin, eastern Minas Gerais and extreme southern Bahia State [A fauna de peixes na bacia do Rio Itanhém, leste de Minas Gerais e extremo Sul da Bahia]	Sarmento-Soares L.M., Mazzoni R., Martins-Pinheiro R.F.	0	Triple	Voluntary (1) and Scholarshiper (1)	2	0	54951	Macrophytes | Eichhornia Azurea | Egeria Najas	0		https://www.scopus.com/inward/record.uri?eid=2-s2.0-77956792701&partnerID=40&md5=64d2a5a8b783f457a656128447dc43d7	Zoology
A new species of Miconia (Melastomataceae: Miconieae) from Espírito Santo, Brazil	Goldenberg R., Kollmann L.J.C.	1	Double	Scholarshiper (2)	5	0.14	78707	Melastomataceae | Hypanthium | Clidemia	0		10.3767/000651910X526708	Botany
New records and distribution of a species vulnerable to extinction: Euparkerella tridactyla (Anura, Strabomantidae)	Ferreira R.B., Silva-Soares T., Tonini J.F.R., Dantas R.B.	1	Quadruple	Scholarshiper (2)	3	0.71	85398	Leptodactylidae | Hylidae | Anura	0		https://www.scopus.com/inward/record.uri?eid=2-s2.0-77953099378&partnerID=40&md5=a9638e931624c9cb9932f14ccabef12c	Zoology
Three new species of Pabstiella (Pleurothallidinae, Orchidaceae) from Brazilian Atlantic forest	Fraga C.N.D., Kollmann L.J.C.	1	Double	Scholarshiper (2)	6	0.15	77813	Orchidaceae | Pleurothallis | Campylocentrum	0		10.3100/025.015.0111	Botany
Three new species of Myrcia section Gomidesia (Myrtaceae) - from Espírito Santo, Brazil	Lughadha E.N., Slade K., Jennings L., Boudet-Fernandes H., Lucas E.	0	Quintuple	Permanent worker	7	0.27	77448	Myrtaceae | Myrcia | Eugenia	1	United Kingdom	10.1007/s12225-009-9171-x	Botany
Miscellaneous new species in the Brazilian Bromeliaceae	Leme E.M.C., De Fraga C.N., Kollmann L.J.C., Brown G.K., Till W., Ribeiro O.B.C., Machado M.C., Monteiro F.J.S., Fontana A.P.	0	múltipla	Scholarshiper (1) and Permanent worker (1)	27	0.36	74240	Bromeliaceae | Vriesea | Aechmea	1	Austria	10.1590/2175-7860201061104	Botany
Amphibia, Anura, Leptodactylidae, Leptodactylus cupreus Caramaschi, Feio and São-Pedro, 2008: Distribution extension	Peres J., Simon J.E., Nascimento D.S., Feio R.N.	1	Quadruple	Scholarshiper (1) and Voluntary (1)	3	0.39	85398	Leptodactylidae | Hylidae | Anura	0		10.15560/6.4.481	Zoology
Comparison of diet and use of bromeliads between a bromelicolous and a bromeligenous anuran at an inselberg in the southeastern of brazil [Comparación de la dieta y el uso de bromelias entre anuros en un afloramiento rocoso en el sudeste de brasil]	Pertel W., Teixeira R.L., Ferreira R.B.	1	Triple	Scholarshiper (1) and Voluntary (1)	11	0.12	75538	Hylidae | Anura | Leptodactylidae	1	USA	https://www.scopus.com/inward/record.uri?eid=2-s2.0-77958021131&partnerID=40&md5=e3bbabe3d73a83dd61ba38a32b36796c	Zoology
New combinations and description of two new species in Pabstiella Brieger & Senghas (Orchidaceae) from Brazil	Kollmann L.J.C.	1	Individual	Scholarshiper	6	0.14	77813	Orchidaceae | Pleurothallis | Campylocentrum	0		10.15553/c2010v651a8	Botany
Feeding pattern and use of reproductive habitat of the Striped toad Rhinella crucifer (Anura: Bufonidae) from Southeastern Brazil	Ferreira R.B., Teixeira R.L.	1	Double	Scholarshiper (1) and Voluntary (1)	11	1.2	75538	Hylidae | Anura | Leptodactylidae	0		https://www.scopus.com/inward/record.uri?eid=2-s2.0-77957167812&partnerID=40&md5=086ddd4b6443c5b526587a1af960580c	Zoology
Sexual dimorphism, reproduction and diet of the casque-headed treefrog Itapotihyla langsdorffii (Hylidae: Lophiohylini)	Vrcibradic D., Teixeira R.L., Borges-Júnior V.N.T.	0	Triple	Voluntary	5	0.13	85398	Leptodactylidae | Hylidae | Anura	0		10.1080/00222930903015824	Zoology
The fish fauna of Rio Jucuruçu basin, eastern Minas Gerais and southern Bahia State [A fauna de peixes na bacia do Rio Jucuruçu, leste de Minas Gerais e extremo Sul da Bahia]	Sarmento-Soares L.M., Mazzoni R., Martins-Pinheiro R.F.	1	Triple	Scholarshiper (1) and Voluntary (1)	13	0.58	89954	Characiformes | Ichthyofauna | Gillnets	0		https://www.scopus.com/inward/record.uri?eid=2-s2.0-68349125494&partnerID=40&md5=ec41346a9d58f9a6e9ca2a96d186184a	Zoology
Begonia bullatifolia L. KOLLMANN and Begonia leopoldinensis L. KOLLMANN (Begoniaceae), two new species from the Atlantic forest in the State of Espírito Santo, Brazil	Kollmann L.J.C.	1	Individual	Scholarshiper	5	0.14	77371	Begonia | Petermannia | Sect	0		https://www.scopus.com/inward/record.uri?eid=2-s2.0-68149169931&partnerID=40&md5=ab202e5b767a6692ca3e52b177ae6f5a	Botany
Correction of the type locality of neomorphus geoffroyi (temminck, (1820), with lectotype designation	Raposo M.A., Simon J.E., Teixeira D.M.	0	Triple	Voluntary	4	0.19	81495	Thamnophilidae | Furnariidae | Tyrannidae	0		https://www.scopus.com/inward/record.uri?eid=2-s2.0-68749115142&partnerID=40&md5=aaae66d0b80e6107c54f0cb5ca708d88	Zoology
Begonia caparaoensis (begoniaceae), a new endemic species from the atlantic forest in the state of Minas Gerais, Brazil	Jacques E.D.L., Kollmann L.J.C.	1	Double	Scholarshiper	2	0	77371	Begonia | Petermannia | Sect	0		10.3417/2007031	Botany
Parotocinclus arandai, a new species of hypoptopomatine catfish (Siluriformes: Loricariidae) from the upper rios Jucuruçu and Buranhém, States of Bahia and Minas Gerais, Brazil	Sarmento-Soares L.M., Lehmann A. P., Martins-Pinheiro R.F.	1	Triple	Scholarshiper (1) and Voluntary (1)	9	0.48	88961	Loricariidae | Characidae | Trichomycteridae	0		10.1590/S1679-62252009000200009	Zoology
A systematic revision of Tatia (Siluriformes: Auchenipteridae: Centromochlinae)	Sarmento-Soares L.M., Martins-Pinheiro R.F.	1	Double	Scholarshiper (1) and Voluntary (1)	33	0.33	88961	Loricariidae | Characidae | Trichomycteridae	0		10.1590/S1679-62252008000300022	Zoology
A new species of Begonia (Begoniaceae) from the atlantic forest of Espírito Santo, Brazil	Kollmann L.J.C., Fontana A.P.	1	Double	Scholarshiper	2	0	77371	Begonia | Petermannia | Sect	0		10.1590/2175-7860200859407	Botany
Phacellodomus ferrugineigula is a valid species [Phacellodomus ferrugineigula (Pelzeln, 1858) (Aves: Furnariidae) é uma espécie válida]	Simon J.E., Pacheco J.F., Whitney B.M., De Mattos G.T., Gagliardi R.L.	1	Quintuple	Voluntary	6	0.49	81495	Thamnophilidae | Furnariidae | Tyrannidae	1	USA	https://www.scopus.com/inward/record.uri?eid=2-s2.0-56249116591&partnerID=40&md5=fba81c5fe9a2c6c4858696a893d2ed95	Zoology
Two new species of Begonia (Begoniaceae) from Espírito Santo State, Brazil [DUAS NOVAS ESPÉCIES DEBEGONIA (BEGONIACEAE) DO ESPÍRITO SANTO, BRASIL]	Kollmann L.J.C.	1	Individual	Scholarshiper (2)	4	0	77371	Begonia | Petermannia | Sect	0		10.1590/2175-7860200859110	Botany
Codonanthe gibbosa Rossini & Chautems (Gesneriaceae), a new species from the State of Espírito Santo, Brazil	Rossini J., Chautems A.	1	Double	Scholarshiper (2)	1	0.16	75061	Gesneriaceae | Primulina | Streptocarpus	1	Switzerland	https://www.scopus.com/inward/record.uri?eid=2-s2.0-38649140671&partnerID=40&md5=1a57c51de6081a77ffc901c1ae69317b	Botany
Begonia callosa L. Kollmann (Begoniaceae), a new species from the Atlantic forest in the State of Espírito Santo, Brazil	Kollmann L.J.C.	1	Individual	Scholarshiper (2)	3	0.16	77371	Begonia | Petermannia | Sect	0		https://www.scopus.com/inward/record.uri?eid=2-s2.0-38649133810&partnerID=40&md5=ad91783a152a6894e82a9747573b7350	Botany
First record of Plain-bellied Emerald, Agyrtria leucogaster (Gmelin, 1788) (Aves: Trochilidae) for Espírito Santo State, Brazil [Primeiro registro de Agyrtria leucogaster (Gmelin, 1788) (Aves: Trochilidae) para o Estado do Espírito Santo, Brasil]	Ruschi P.A., Simon J.E.	1	Double	Voluntary (2)	0	0	81495	Thamnophilidae | Furnariidae | Tyrannidae	0		https://www.scopus.com/inward/record.uri?eid=2-s2.0-52249088208&partnerID=40&md5=d8917054440d31ebb33dfaff0f3967a7	Zoology
An analysis of the role of local fishermen in the conservation of the loggerhead turtle (Caretta caretta) in Pontal do Ipiranga, Linhares, ES, Brazil	Almeida A.d.P., Mendes S.L.	1	Double	Permanent worker	12	0.88	97013	Caretta Caretta | Chelonia Mydas | Eretmochelys Imbricata	0		10.1016/j.biocon.2006.07.014	Zoology
Myrcia inconspicua (Myrtaceae), a new species from Espírito Santo, Brazil	Kollmann L.J.C., Sobral M.	1	Double	Scholarshiper	2	0	77448	Myrtaceae | Myrcia | Eugenia	0		10.3417/1055-3177(2006)16[501:MIMANS]2.0.CO;2	Botany
Begonia novalombardiensis L. Kollmann (Begoniaceae), a new species from the Atlantic forest in the State of Espirito Santo, Brazil [Begonia novalombardiensis L. Kollmann (Begoniaceae), une nouvelle espèce de la forêt atlantique de l'Etat de l'Espirito Santo, Brésil]	Kollmann L.J.C.	1	Individual	Scholarshiper	6	0.5	77371	Begonia | Petermannia | Sect	0		https://www.scopus.com/inward/record.uri?eid=2-s2.0-33748274115&partnerID=40&md5=ba22276c96c777d912df4fba77be2a8f	Botany
On the standardization of nest descriptions of neotropical birds	Simon J.E., Pacheco S.	1	Double	Voluntary	113	2.68	64599	Thraupidae | Plumage | Nestlings	0		https://www.scopus.com/inward/record.uri?eid=2-s2.0-51849100477&partnerID=40&md5=a00b83710de262bb96fac6414bc4b700	Zoology
Ecological comparisons between the sympatric lizards Enyalius bilineatus and Enyalius brasiliensis (Iguanidae, Leiosaurinae) from an Atlantic rain-forest area in Southeastern Brazil	Teixeira R.L., Roldi K., Vrcibradic D.	1	Triple	Voluntary	25	0.63	78020	Squamata | Teiidae | Lizards	0		10.1670/9-05N.1	Zoology
First documented record of Anhima cornuta (Linnaeus, 1766) (Anseriformes: Anhimidae) for the state of Espirito Santo, Brazil [Primeiro registro documentado de Anhima cornuta (Linnaeus, 1766) (Anseriformes: Anhimidae) para o Estado do Espírito Santo, Brasil]	Simon J.E., Lima S.R.	1	Double	Voluntary	1	0.27	63631	Harpia Harpyja | Hawks | Accipitridae	0		https://www.scopus.com/inward/record.uri?eid=2-s2.0-48749120507&partnerID=40&md5=2d4f95a46eabdd19e6e2c3002f3567f2	Zoology
Floristic survey of a restinga forest in Guarapari, Espirito Santo State, Brazil [Florística de um trecho de floresta de restinga no município de Guarapari, Espírito Santo, Brasil]	de Assis A.M., Thomaz L.D., Pereira O.J.	1	Triple	Permanent worker	46	0.36	48786	Myrtaceae | Floristics | Herbaria	0		https://www.scopus.com/inward/record.uri?eid=2-s2.0-85016304318&partnerID=40&md5=5e4abac4c47966f13edc873a47b53cd2	Botany
Food habits and ecology of Pseudis bolsodactyla (Anura: Pseudidae) from a flood plain in south-eastern Brazil	Teixeira R.L., Vrcibradic D., Schineider J.A.P.	1	Triple	Voluntary	8	0	57878	Anura | Hylidae | Rhacophoridae	0		https://www.scopus.com/inward/record.uri?eid=2-s2.0-10644250032&partnerID=40&md5=81a87723050f0e5adb4c8eefa6d918d0	Zoology
Bird Extinctions in Atlantic Forest Fragments of the Viçosa Region, Southeastern Brazil	Ribon R., Simon J.E., De Mattos G.T.	0	Triple	Voluntary	132	2.24	84374	Insectivores | Frugivores | Habitat Fragmentation	0		10.1111/j.1523-1739.2003.00377.x	Zoology
Myoxanthus ruschii (Orchidaceae), a new species from Brazilian Atlantic forest, Espírito Santo	De Fraga C.N., Kollmann L.J.C.	1	Double	Scholarshiper (1) and Permanent worker (1)	2	0.18	77813	Orchidaceae | Pleurothallis | Campylocentrum	0		10.2307/3393564	Botany
The occurrence of amphibians in bromeliads from a southeastern Brazilian restinga habitat, with special reference to Aparasphenodon brunoi (Anura, Hylidae)	Teixeira R.L., Schineider J.A.P., Almeida G.I.	1	Triple	Voluntary (3)	36	0.18	75538	Hylidae | Anura | Leptodactylidae	0		10.1590/S1519-69842002000200010	Zoology
Relationship between anuran amphibians and bromeliads of the sandy coastal plain of Regência, Linhares, Espírito Santo, Brazil [Relacionamento entre anfíbios anuros e bromélias da restinga de Regência, Linhares, Espírito Santo, Brasil]	Schineider J.A.P., Teixeira R.L.	1	Double	Voluntary (2)	37	0.32	75538	Hylidae | Anura | Leptodactylidae	0		https://www.scopus.com/inward/record.uri?eid=2-s2.0-52549091006&partnerID=40&md5=7a7d3cd78478dd9688e3fe42ce303f0a	Zoology
Timing of births in sympatric brown howler monkeys (Alouatta fusca clamitans) and Northern Muriquis (Brachyteles arachnoides hypoxanthus)	Strier K.B., Mendes S.L., Santos R.R.	1	Triple	Permanent worker (1) and Voluntary (1)	46	1.54	85993	Macaca | Papio | Primates	1	USA	10.1002/ajp.1042	Zoology
Primate population densities and sizes in Atlantic forest remnants of northern Espírito Santo, Brazil	Chiarello A.G., De Melo F.R.	1	Double	Voluntary	58	0.26	78245	Alouatta | Atelidae | Primates	1	United Kingdom	10.1023/A:1010751527749	Zoology
Reproduction and food habits of the lined seahorse, Hippocampus erectus (Teleostei: Syngnathidae) of Chesapeake Bay, Virginia.	Teixeira R.L., Musick J.A.	1	Double	Voluntary	66	1.14	82039	Syngnathidae | Smegmamorpha | Hippocampus Erectus	0		https://www.scopus.com/inward/record.uri?eid=2-s2.0-0035260799&partnerID=40&md5=4d14a9ab2af85bbbd63709176bb7dc3f	Zoology
Density and population size of mammals in remnants of Brazilian Atlantic forest	Chiarello A.G.	1	Individual	Voluntary	144	2.12	82043	Didelphimorphia | Opossums | Marsupial	1	United Kingdom	10.1046/j.1523-1739.2000.99071.x	Zoology
Feeding behavior of Geoffroy's marmoset (Callithrix geoffroyi) in an Atlantic forest fragment of South-eastern Brazil	Passamani M., Rylands A.B.	1	Double	Scholarshiper	33	0.68	76235	Callithrix | Leontopithecus Chrysomelas | Pitheciidae	0		10.1007/BF02557459	Zoology
The mellitophily in Passiflora alata Dryander (Passifloraceae), in restinga vegetation [A Melitofilia em Passiflora alata Dryander (Passifloraceae), em Vegetação de Restinga*]	Varassin I.G., Gomes da Silva A.	1	Double	Scholarshiper	15	0	76777	Halictidae | Carpenter Bees | Xylocopa	0		https://www.scopus.com/inward/record.uri?eid=2-s2.0-85057396593&partnerID=40&md5=ce604c7f8adda6875a622ed97539349d	Others
Activity budget of Geoffroy's marmoset (Callithrix geoffroyi) in an Atlantic forest in southeastern Brazil	Passamani M.	1	Individual	Scholarshiper	34	0.59	76235	Callithrix | Leontopithecus Chrysomelas | Pitheciidae	0		10.1002/(SICI)1098-2345(1998)46:4<333::AID-AJP5>3.0.CO;2-7	Zoology
Diet of the Atlantic forest maned sloth Bradypus torquatus (Xenarthra: Bradypodidae)	Chiarello A.G.	1	Individual	Voluntary	32	0.88	68051	Myrmecophaga Tridactyla | Sloths | Pilosa	1	United Kingdom	10.1017/S0952836998009029	Zoology
Activity budgets and ranging patterns of the Atlantic forest maned sloth Bradypus torquatus (Xenarthra: Bradypodidae)	Chiarello A.G.	1	Individual	Voluntary	33	0.59	68051	Myrmecophaga Tridactyla | Sloths | Pilosa	1	United Kingdom	10.1017/S0952836998009017	Zoology
Ecological topics of Phyllodytes luteolus (Amphibia, Hylidae) in a sandy coastal plain of Sao Mateus, Espirito Santo State [Topicos ecologicos de Phyllodytes luteolus (Amphibia, Hylidae) da restinga de guriri, Sao Mateus - ES]	Teixeira R.L., Zamprogno C., Almeida G.I., Schineider J.A.P.	1	Quadruple	Voluntary (2)	19	0.45	75538	Hylidae | Anura | Leptodactylidae	0		https://www.scopus.com/inward/record.uri?eid=2-s2.0-0031392736&partnerID=40&md5=e606e4d929c82dfba00c02568aa9a8f1	Zoology
Ecology of young mojarras (Pisces: Gerreidae) occupying the shallow waters of a tropical estuary	Teixeira R.L., Helmer J.L.	1	Double	Voluntary	17	0	75543	Eucinostomus | Sphoeroides Testudineus | Diapterus	0		https://www.scopus.com/inward/record.uri?eid=2-s2.0-0031391222&partnerID=40&md5=a84da79376e6f998142faf74a1e9f484	Zoology
Field observations on the thin-spined porcupine, Chaetomys subspinosus (Rodentia; Echimyidae)	Chiarello A.G., Passamani M., Zortéa M.	1	Triple	Voluntary-Scholarshiper (2) and Permanent worker (1)	21	0.61	55138	Porcupines | Hystricidae | Erethizontidae	1	United Kingdom	10.1515/mamm.1997.61.1.29	Zoology
Field observation of a group of Geoffroy’s marmosets mobbing a margay cat	Passamani M.	1	Individual	Scholarshiper	31	0	0		0		10.1159/000156848	Zoology
Observations on the big fruit-eating bat, Artibeus lituratus, in an urban reserve of south-east Brazil	Zortea M., Chiarello A.G.	1	Double	Voluntary (1) and Permanent worker (1)	25	0	0		0		https://www.scopus.com/inward/record.uri?eid=2-s2.0-0028191129&partnerID=40&md5=c4b906281b338d0330c159f77dd9dc60	Zoology
Folivory in the big fruit-eating bat, artiheus lituratus (chiroptera: Phyllostomidae) in eastern Brazil	Zortéa M., Mendes S.L.	1	Double	Permanent worker (2)	27	0	0		0		10.1017/S0266467400007057	Zoology
Habits of the southern bamboo rat, kannabateomys amblyonyx (rodentia, echimyidae) in southeastern brazil	Olmos F., Galetti M., Paschoal M., Mendes S.L.	1	Quadruple	Permanent worker	9	0	0		0		10.1515/mamm.1993.57.3.325	Zoology
Total		89			1504				37
Collaborating countries	Articles		Authorship	Articles		Thematic Object of the Study		Articles	Percentage
USA	22		Individual	14		Zoology		91	0.659
United Kingdom	8		Double	36		Botany		42	0.304
Argentina	4		Triple	34		Others		5	0.036
Germany	3		Quadruple	15
Colombia	3		Quintuple	18
Australia	2		Multiple	21
Austria	2		Total	138
Canada	2
Denmark	2
Spain	2		Articles with first and last author affiliated to INMA
Peru	2		89 articles	0.644
Sweden	2
Switzerland	2
Venezuela	2		Articles with international collaboration
Bangladesh	1		37 articles	0.27
Chile	1
Costa Rica	1
Ecuador	1
Finland	1
France	1
Faroe Islands	1
Iceland	1
Italy	1
Japan	1
Malaysia	1
Morocco	1
Mexico	1
Norway	1
Netherlands	1
Panama	1
Poland	1
Sri Lanka	1
Thailand	1
Tunisia	1
Turkey	1
Uruguay	1
Tópics	Proeminence	Articles
Begonia | Petermannia | Sect	77371	12
Leptodactylidae | Hylidae | Anura	85398	12
Loricariidae | Characidae | Trichomycteridae	88961	11
Hylidae | Anura | Leptodactylidae	75538	7
Melastomataceae | Hypanthium | Clidemia	78707	5
Bromeliaceae | Vriesea | Aechmea	74240	4
Orchidaceae | Pleurothallis | Campylocentrum	77813	4
Characiformes | Ichthyofauna | Gillnets	89954	3
Myrtaceae | Myrcia | Eugenia	77448	3
Squamata | Teiidae | Lizards	78020	3
Thamnophilidae | Furnariidae | Tyrannidae	81495	3
Alouatta | Atelidae | Primates	78245	2
Aristolochiaceae | Perianth | Asarum	64667	2
Callithrix | Leontopithecus Chrysomelas | Pitheciidae	76235	2
Chloroplast Genome | Transfer RNA | Base Composition	93415	2
Dillenia Indica | Calyx | Betulic Acid	29626	2
Epiphytes | Bromeliaceae | Tillandsia	84957	2
Eucinostomus | Sphoeroides Testudineus | Diapterus	75543	2
Gesneriaceae | Primulina | Streptocarpus	75061	2
Myrmecophaga Tridactyla | Sloths | Pilosa	68051	2
Ribeiroia Ondatrae | Cercariae | Amphibians	64195	2
Amblyomma | Ixodidae | Rickettsia	94890	1
Anthurium | Araceae | Philodendron	74922	1
Ants | Hymenoptera | Crematogaster	90187	1
Anura | Hylidae | Rhacophoridae	57878	1
Arecaceae | Elaeidobius | Calamus	77855	1
Ariidae | Catfishes | Aspistor	27760	1
Biological Soil Crusts | Lichen Crusts | Microcoleus	96889	1
Blenniidae | Lipophrys Pholis | Salaria Pavo	69187	1
Bombus | Pollinators | Neonicotinoids	99804	1
Bullfrog | Pelophylax Nigromaculatus | Procambarus Clarkii	67737	1
Camera Trapping | Tigers | Capture-Recapture	96580	1
Caretta Caretta | Chelonia Mydas | Eretmochelys Imbricata	97013	1
Caretta Caretta | Heterophils | Chelonia Mydas	71532	1
Chironomidae | Macroinvertebrates | Clitellata	64860	1
Coastal Plains | Holocene | Sea-Level Change	80598	1
Didelphimorphia | Opossums | Marsupial	82043	1
Dolomedes | Spiders | Theraphosidae	47433	1
Edible Bird's Nests | Aerodramus | Apodidae	76241	1
Eleutherodactylus | Cyclura | Iguanas	79967	1
Floristics | Cerrado | Basal Area	79557	1
Forensic Entomology | Calliphoridae | Chrysomya Megacephala	95138	1
Formica | Temnothorax | Ants	77656	1
Glaucidium (Strigidae) | Hawks | Raptors	51740	1
Halictidae | Carpenter Bees | Xylocopa	76777	1
Harpia Harpyja | Hawks | Accipitridae	63631	1
Hyporheic Zone | Macroinvertebrates | Gammarus Pulex	90026	1
Insectivores | Frugivores | Habitat Fragmentation	84374	1
Interdisciplinary | Disciplinary Boundaries | Student Teams	61891	1
Linderniaceae | Scrophulariaceae | Plantaginaceae	43924	1
Macaca | Papio | Primates	85993	1
Macrophytes | Eichhornia Azurea | Egeria Najas	54951	1
Melanophryniscus | Bufonidae | Rhinella	46131	1
Myrtaceae | Floristics | Herbaria	48786	1
Nymphalidae | Riodinidae | Lycaenidae	80580	1
Porcupines | Hystricidae | Erethizontidae	55138	1
Primula | Floral Trait | Herkogamy	80151	1
Rhinopithecus | Cercopithecidae | Atelinae	88210	1
Seed Dispersal | Frugivores | Negative Dependence	96339	1
Sex Determination | W Chromosome | DNA Helicase	65090	1
Skin Glands | Hylidae | Anura	61874	1
Spumavirus | Simian Foamy Virus | Retroviridae	76860	1
Syngnathidae | Smegmamorpha | Hippocampus Erectus	82039	1
Tandem-X | PALSAR | Forest Biomass	88891	1
Thraupidae | Plumage | Nestlings	64599	1
Tonic Immobility Response | Defensive Behavior | Anura	25776	1
Yellow Fever Virus | Haemagogus | Flaviviridae	97020	1
